# Supplementary material
Source: Springer Nature journal article supplement (https://www.springermedizin.de/resource/supplementary/12881_2012_980_MOESM2_ESM.pdf/9451734)

**Family 1  
IV-2**

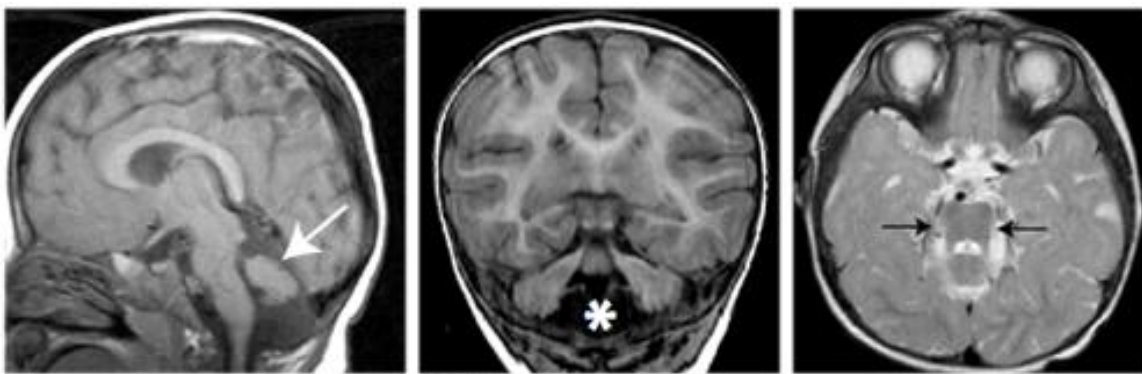

**Family 1  
IV-4**

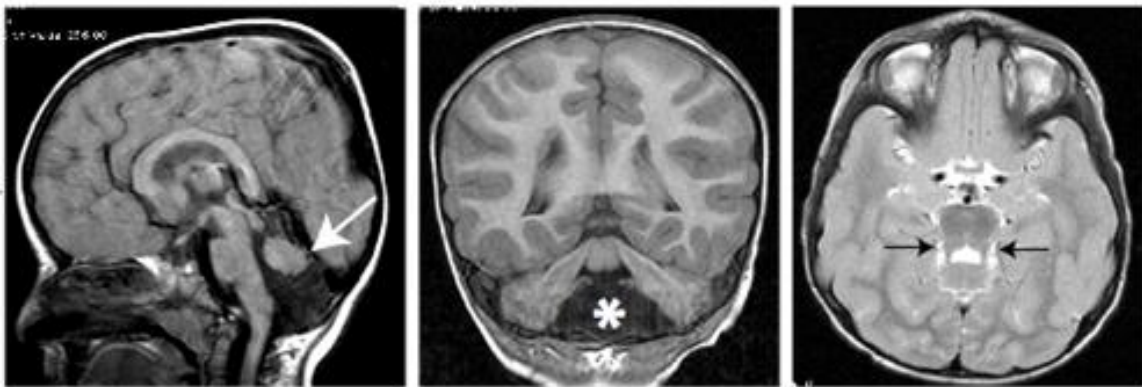

**Family 1  
IV-8**

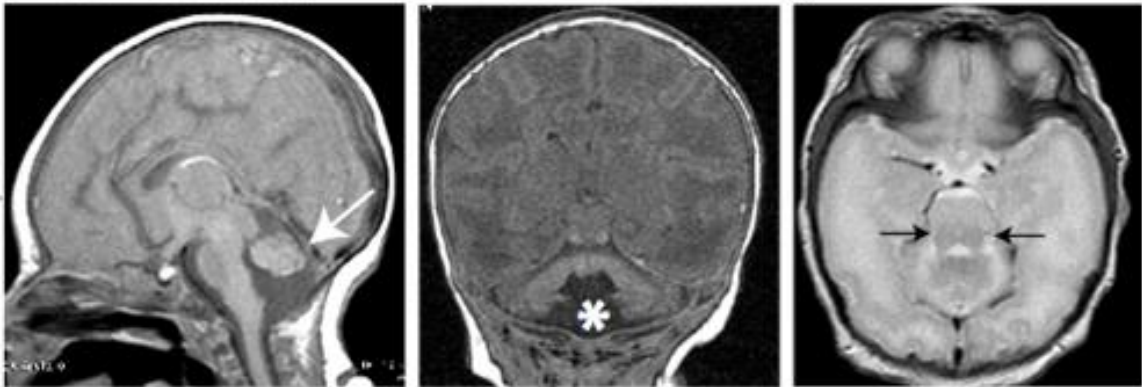

**Family 2  
IV-8**

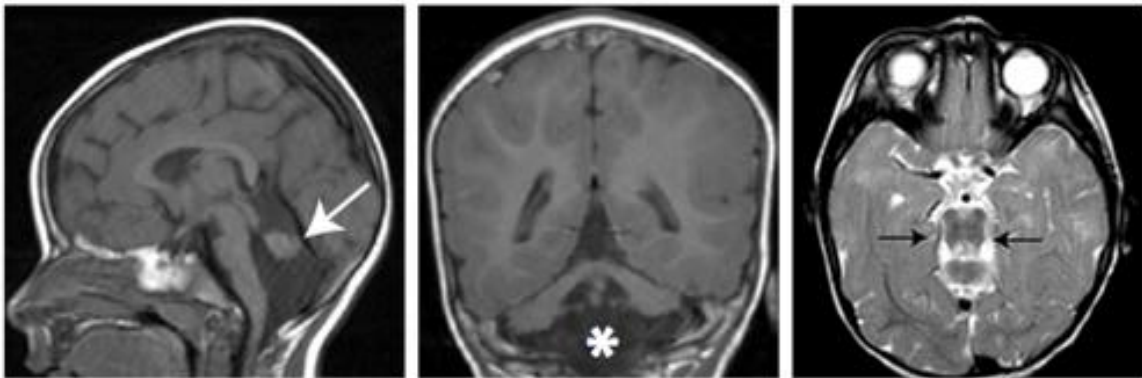

Supplement: MOESM2 [file 9451734]
